# Supplementary material for: The Evaluation of the Rapid Sand Filter Wash Interval at the Central DWTP in the Czech Republic
Source: MDPI journal article supplement (doi:10.3390/engproc2023057009), 2023-11-29
Supplement: s1 [file s1]

## Supplementary Materials

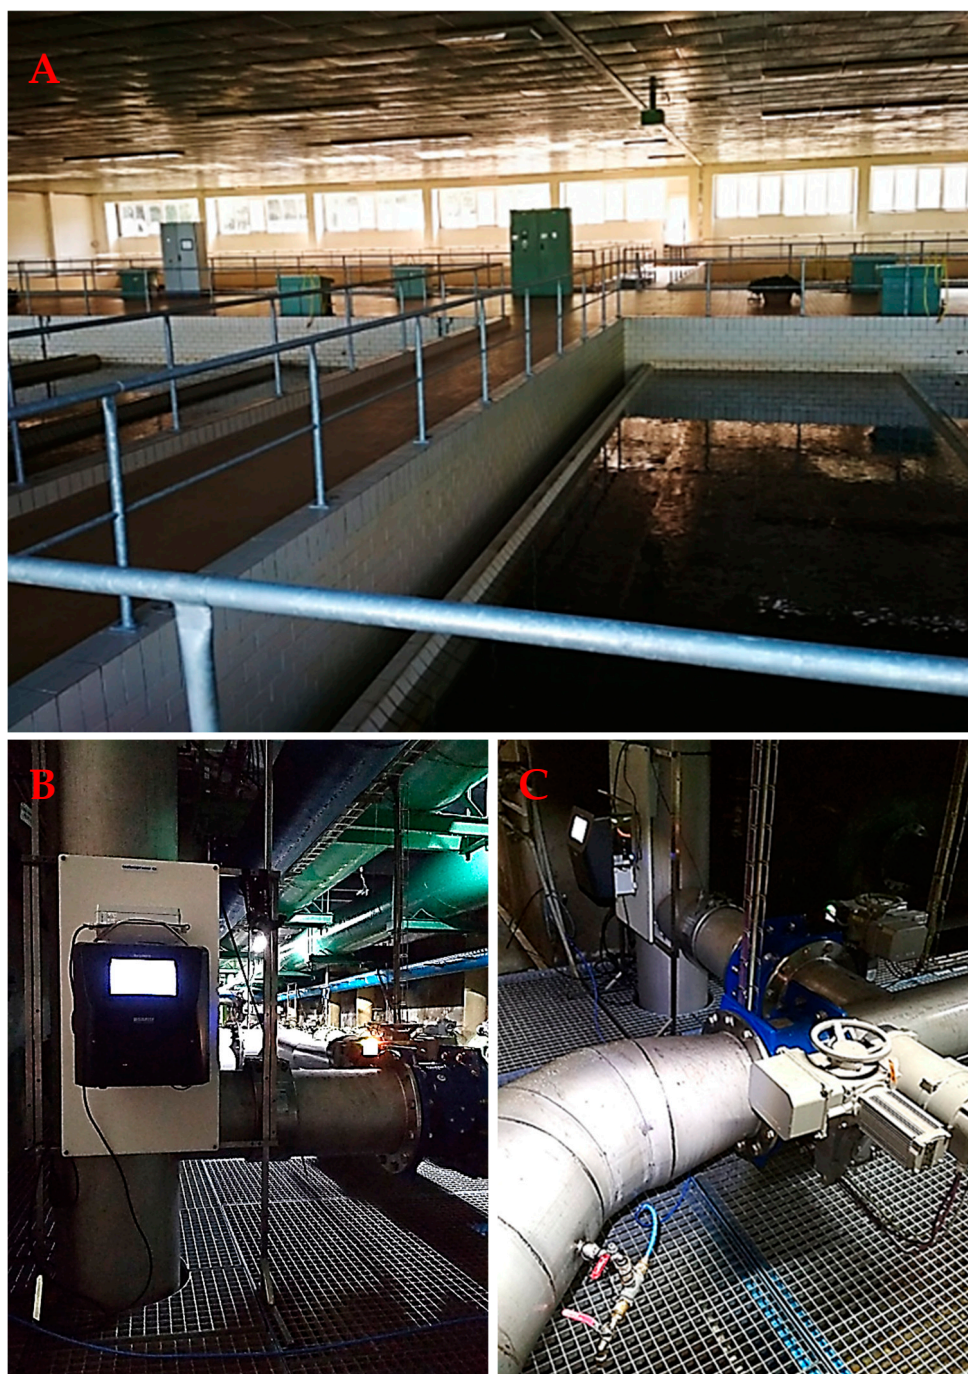

**Figure S1.** The DWTP Nová Ves: A—13N filter, B—FC BactoSense fitting under the 13N filter, C—Detail of the connection to the water feed in automatic mode.

**Table S1.** The list of monitored physico-chemical and microbiology indicators in water samples.

| Water sample                   | Laboratory results                                                                                                                                                                                                          | Flow cytometry results                                                                                                                                                |
|--------------------------------|-----------------------------------------------------------------------------------------------------------------------------------------------------------------------------------------------------------------------------|-----------------------------------------------------------------------------------------------------------------------------------------------------------------------|
| Raw water                      | temperature (°C), colour (mg/L Pt), turbidity (NTU), pH (-), acidity (mmol/L), alkalinity (mmol/L), COD <sub>Mn</sub> (mg/L), total count of organisms per mL, live organisms per mL, abiosestion (%), HPC at 22°C and 36°C | turbidity (NTU), TCC <sup>2</sup> per mL, ICC <sup>3</sup> per mL, DCC <sup>4</sup> per mL, HNAC <sup>5</sup> per mL, LNAC <sup>6</sup> per mL, HNAP <sup>7</sup> (%) |
| RWW <sup>8</sup><br>13N filter | (CFU <sup>1</sup> per mL)                                                                                                                                                                                                   |                                                                                                                                                                       |

<sup>1</sup> Colony-Forming Units; <sup>2</sup> Total Cell Count (live and dead) per mL; <sup>3</sup> Intact Cell Count (intact or live) per mL; <sup>4</sup> Dead Cell count per mL; <sup>5</sup> High Nucleic Acid Count per mL; <sup>6</sup> Low Nucleic Acid Count per mL; <sup>7</sup> High Nucleic Acid Percentage HNAP=HNAC/ICC; <sup>8</sup> Recirculation Wash Water.

**Table S2.** The 1st stage – microbiology analysis: laboratory and FCM.

| Water sample     | Date    | Time  | Laboratory results |                  |                                            |               |                                                     | Flow cytometry results                              |                            |                            |                            |                             |                             |                     |       |
|------------------|---------|-------|--------------------|------------------|--------------------------------------------|---------------|-----------------------------------------------------|-----------------------------------------------------|----------------------------|----------------------------|----------------------------|-----------------------------|-----------------------------|---------------------|-------|
|                  |         |       | colour<br>mg/L Pt  | turbidity<br>NTU | total<br>count of live org.<br>org. per mL | abiosestion % | HPC <sup>1</sup> 22°C<br>CFU <sup>2</sup> per<br>mL | HPC <sup>1</sup><br>36°C CFU<br><sup>2</sup> per mL | TCC <sup>3</sup><br>per mL | ICC <sup>4</sup><br>per mL | DCC <sup>5</sup><br>per mL | HNAC <sup>6</sup><br>per mL | LNAC <sup>7</sup><br>per mL | HNAP <sup>8</sup> % |       |
| RWW <sup>9</sup> | 14.8.19 | 14:22 | 80                 | 9.5              | 112                                        | 40            | 4                                                   | > 300                                               | 121                        | 1,012,855                  | 295,933                    | 716,922                     | 254,044                     | 41,888              | 99.14 |
|                  |         | 16:20 | 58                 | 6.2              | 150                                        | 86            | 3                                                   | > 300                                               | 93                         | 614,544                    | 217,588                    | 396,955                     | 193,511                     | 24,077              | 99.11 |
|                  |         | 18:22 | 58                 | 5.9              | 184                                        | 94            | 2                                                   | > 300                                               | 119                        | 777,263                    | 266,095                    | 511,168                     | 237,444                     | 28,651              | 99.11 |
|                  | 15.8.19 | 14:22 | 67                 | 6.7              | 178                                        | 66            | 1                                                   | > 300                                               | 131                        | 1,116,861                  | 391,903                    | 724,958                     | 359,259                     | 32,643              | 99.08 |
|                  |         | 15:20 | 65                 | 0.7              | 254                                        | 122           | 1                                                   | > 300                                               | 147                        | 1,273,966                  | 343,809                    | 930,157                     | 310,687                     | 33,121              | 99.10 |
|                  |         | 16:22 | 63                 | 8.2              | 144                                        | 50            | 1                                                   | > 300                                               | 125                        | 1,104,279                  | 373,007                    | 731,271                     | 334,927                     | 38,080              | 99.10 |
|                  | 18.8.19 | 14:10 | 5.3                | 2.9              | 432                                        | 288           | 3                                                   | 140                                                 | 52                         | 683,211                    | 325,477                    | 357,733                     | 302,166                     | 23,311              | 99.07 |
|                  |         | 16:10 | 4.1                | 2.3              | 576                                        | 504           | 3                                                   | 135                                                 | 14                         | 488,955                    | 158,833                    | 330,122                     | 144,355                     | 14,477              | 99.09 |
|                  |         | 18:10 | 6.2                | 2.9              | 216                                        | 168           | 3                                                   | 180                                                 | 40                         | 440,011                    | 144,900                    | 295,111                     | 133,322                     | 11,577              | 99.08 |
|                  | 19.8.19 | 12:00 | 8.2                | 14.2             | 720                                        | 432           | 3                                                   | > 300                                               | 100                        | 1,467,822                  | 560,400                    | 907,422                     | 512,511                     | 47,888              | 99.09 |
|                  |         | 13:00 | 6.3                | 7.3              | 552                                        | 456           | 3                                                   | > 300                                               | 60                         | 994,655                    | 376,777                    | 617,877                     | 338,811                     | 37,966              | 99.10 |
|                  |         | 14:00 | 6.3                | 7.2              | 456                                        | 408           | 2                                                   | > 300                                               | 28                         | 749,133                    | 218,522                    | 530,611                     | 200,911                     | 17,611              | 99.08 |
| 13N filter       | 15.8.19 | 6:22  | 1.7                | 0.2              | 2                                          | 0             | < 1                                                 | 50                                                  | 8                          | 213,744                    | 130,844                    | 82,900                      | 117,900                     | 12,944              | 99.10 |
|                  | 16.8.19 | 6:22  | 3.3                | 0.2              | 4                                          | 0             | < 1                                                 | -                                                   | -                          | 778,244                    | 685,477                    | 92,766                      | 611,944                     | 73,533              | 99.11 |
|                  | 19.8.19 | 4:10  | 3.3                | 0.1              | 4                                          | 4             | < 1                                                 | -                                                   | -                          | 707,944                    | 630,304                    | 77,640                      | 562,322                     | 67,981              | 99.11 |
|                  | 21.8.19 | 5:10  | 3.1                | 0.1              | 6                                          | 0             | < 1                                                 | -                                                   | -                          | 551,133                    | 508,577                    | 42,555                      | 446,466                     | 62,111              | 99.12 |

<sup>1</sup> Laboratory cultivation analyses – Heterotrophic Plate Count method (HPC) at 22°C and 36°C; <sup>2</sup> Colony-Forming Units; <sup>3</sup> Total Cell Count (live and dead) per mL; <sup>4</sup> Intact Cell Count (intact or live) per mL; <sup>5</sup> Dead Cell count per mL; <sup>6</sup> High Nucleic Acid Count per mL; <sup>7</sup> Low Nucleic Acid Count per mL; <sup>8</sup> High Nucleic Acid Percentage HNAP=HNAC/ICC; <sup>9</sup> Recirculation Wash Water.

**Table S3.** Laboratory analysis of the raw water DWTP Nová Ves.

| No.<br>sample     | Date       | Time  | T    | Colour<br>1 | Turbidity<br>2 | pH<br>3 | COD <sub>Mn</sub><br>4 | Total count<br>of org. 5 | Live<br>organisms<br>5 | Dead<br>organisms<br>5 |
|-------------------|------------|-------|------|-------------|----------------|---------|------------------------|--------------------------|------------------------|------------------------|
|                   |            |       | °C   | mg/L Pt     | NTU            | -       | mg/L                   | org/mL                   | org/mL                 | org/mL                 |
| 19354             | 09.08.2019 | 6:15  | 10.0 | 15.6        | 1.5            | 7.10    | 2.7                    | 56                       | 44                     | 12                     |
| 19408             | 10.08.2019 | 6:13  | 10.1 | 15.8        | 1.6            | 7.10    | 2.8                    | 96                       | 72                     | 24                     |
| 19463             | 11.08.2019 | 18:00 | 10.1 | 13.6        | 2.0            | 7.10    | 3.0                    | 108                      | 68                     | 40                     |
| 19467             | 12.08.2019 | 6:10  | 10.1 | 13.2        | 1.8            | 7.10    | 2.9                    | 120                      | 68                     | 52                     |
| 19747             | 13.08.2019 | 21:25 | 9.9  | 14.1        | 1.8            | 7.10    | 2.8                    | 92                       | 60                     | 32                     |
| 19781             | 14.08.2019 | 6:06  | 9.9  | 14.1        | 1.7            | 7.10    | 2.8                    | 100                      | 64                     | 36                     |
| 19893             | 15.08.2019 | 6:12  | 9.8  | 12.9        | 1.4            | 7.10    | 3.0                    | 72                       | 44                     | 28                     |
| 19999             | 16.08.2019 | 6:10  | 9.9  | 13.6        | 1.5            | 7.10    | 3.1                    | 116                      | 72                     | 44                     |
| 20045             | 17.08.2019 | 6:15  | 9.9  | 16.1        | 1.9            | 7.10    | 3.0                    | 100                      | 64                     | 36                     |
| 20108             | 18.08.2019 | 17:15 | 9.9  | 16.5        | 1.3            | 7.20    | 3.1                    | 68                       | 44                     | 24                     |
| 20117             | 19.08.2019 | 6:07  | 9.9  | 17.3        | 1.6            | 7.15    | 3.0                    | 58                       | 48                     | 10                     |
| 20420             | 20.08.2019 | 19:30 | 9.9  | 16.1        | 2.0            | 7.20    | 3.0                    | 88                       | 64                     | 24                     |
| 20423             | 21.08.2019 | 6:19  | 9.9  | 15.4        | 1.5            | 7.20    | 2.8                    | 104                      | 72                     | 32                     |
| 20557             | 22.08.2019 | 6:08  | 9.8  | 14.8        | 1.5            | 7.25    | 3.0                    | 64                       | 48                     | 16                     |
| 20615             | 23.08.2019 | 6:15  | 9.8  | 14.3        | 1.2            | 7.05    | 3.0                    | 56                       | 40                     | 16                     |
| average of values |            |       | 9.9  | 14.9        | 1.6            | 7.13    | 2.9                    | 87                       | 58                     | 28                     |
| 29101             | 27.11.2019 | 6:07  | 9.6  | 22.7        | 2.3            | 7.45    | 3.1                    | 496                      | 448                    | 48                     |
| 29221             | 28.11.2019 | 6:04  | 9.5  | 24.0        | 2.2            | 7.45    | 3.3                    | 528                      | 464                    | 64                     |
| 29336             | 29.11.2019 | 6:09  | 9.4  | 22.5        | 2.7            | 7.40    | 3.0                    | 392                      | 376                    | 16                     |
| 29391             | 30.11.2019 | 6:12  | 9.2  | 21.8        | 3.4            | 7.45    | 3.2                    | 352                      | 320                    | 32                     |
| 29400             | 01.12.2019 | 16:45 | 9.0  | 17.7        | 3.0            | 7.50    | 3.2                    | 456                      | 384                    | 72                     |
| 29404             | 02.12.2019 | 6:14  | 9.0  | 16.5        | 2.8            | 7.50    | 3.6                    | 560                      | 464                    | 96                     |
| 29531             | 03.12.2019 | 6:05  | 8.8  | 16.7        | 2.3            | 7.50    | 3.3                    | 360                      | 304                    | 56                     |
| 29736             | 04.12.2019 | 6:06  | 8.6  | 18.3        | 2.4            | 7.40    | 3.0                    | 432                      | 392                    | 40                     |
| 29916             | 05.12.2019 | 6:15  | 8.4  | 18.0        | 2.2            | 7.45    | 3.1                    | 592                      | 488                    | 104                    |
| 30028             | 06.12.2019 | 6:15  | 8.2  | 17.9        | 2.6            | 7.40    | 2.8                    | 520                      | 408                    | 112                    |
| 30073             | 07.12.2019 | 6:13  | 7.9  | 17.7        | 2.3            | 7.45    | 3.1                    | 544                      | 448                    | 96                     |
| 30082             | 08.12.2019 | 17:30 | 7.8  | 19.2        | 2.1            | 7.40    | 3.2                    | 512                      | 440                    | 72                     |
| 30086             | 09.12.2019 | 6:23  | 7.8  | 18.0        | 2.0            | 7.40    | 3.0                    | 576                      | 528                    | 48                     |
| 30333             | 11.12.2019 | 6:11  | 7.2  | 20.8        | 2.0            | 7.40    | 3.0                    | 488                      | 432                    | 56                     |
| 30522             | 12.12.2019 | 6:11  | 7.0  | 18.0        | 2.2            | 7.40    | 3.3                    | 312                      | 272                    | 40                     |
| 30632             | 13.12.2019 | 6:05  | 7.0  | 20.6        | 2.0            | 7.40    | 3.0                    | 368                      | 304                    | 64                     |
| 30683             | 14.12.2019 | 6:18  | 6.9  | 19.4        | 2.1            | 7.40    | 3.1                    | 384                      | 336                    | 48                     |
| 30746             | 15.12.2019 | 17:10 | 6.8  | 16.2        | 2.3            | 7.45    | 3.4                    | 504                      | 432                    | 72                     |
| 30750             | 16.12.2019 | 6:13  | 6.8  | 16.6        | 2.2            | 7.45    | 3.0                    | 720                      | 672                    | 48                     |
| 30812             | 17.12.2019 | 6:09  | 6.7  | 18.8        | 2.4            | 7.45    | 3.1                    | 536                      | 512                    | 24                     |
| 30921             | 18.12.2019 | 6:10  | 6.8  | 18.8        | 2.0            | 7.45    | 3.1                    | 776                      | 704                    | 72                     |
| average of values |            |       | 8.0  | 19.1        | 2.4            | 7.4     | 3.1                    | 496                      | 435                    | 61                     |

<sup>1</sup> ČSN EN ISO 7887 Water quality – Examination and determination of colour; <sup>2</sup> ČSN EN 27888 Water quality. Determination of electrical conductivity; <sup>3</sup> ČSN ISO 10523 Water quality – Determination of pH; <sup>4</sup> ČSN EN ISO 8467 Water quality. Determination of permanganate index; <sup>5</sup> ČSN 75 7712 Water quality – Biological analysis – Determination of bioseston.
